# Supplementary material for: NopC/T/L Signal Crosstalk Gene GmPHT1-4
Source: Int J Mol Sci. 2023 Nov 20;24(22):16521. doi: 10.3390/ijms242216521 (PMC10671193; doi:10.3390/ijms242216521)
Supplement: Supplementary file 1 [file ijms-24-16521-s001.zip]

Archive with 12 entries (12 files):
- Figure S1.jpg
- Figure S2.jpg
- Figure S3.jpg
- Figure S4.jpg
- Figure S5.jpg
- Figure S6.jpg
- Figure S7.jpg
- Figure S8.jpg
- ijms-2674064-supplementary.pdf
- Table S1 Nodule numbers statistics.xlsx
- Table S2 Nodular dry weight statistics.xlsx
- Table S3 Primer table.xlsx
