# Supplementary material for: NopC/T/L Signal Crosstalk Gene GmPHT1-4
Source: Int J Mol Sci. 2023 Nov 20;24(22):16521. doi: 10.3390/ijms242216521 (PMC10671193; doi:10.3390/ijms242216521)
Supplement: Supplementary file 1 [file ijms-24-16521-s001.zip › Table S1 Nodule numbers statistics.xlsx]

## Sheet: Sheet1
Table S1 Nodule numbers statistics
HH103	NopC	NopL	NopT	TCL	TtsI	SD
33	8	24	19	12	2	11.2901
39	13	16	29	16	5	12.2257
42	12	16	26	16	5	12.9576
43	15	10	18	18	5	13.1669
44	13	27	11	20	10	13.0448
30	17	17	19	11	9	7.38692
51	10	33	25	18	6	16.5338
31	10	19	15	19	1	10.0482
26	16	22	18	10	11	6.21021
21	8	13	19	9	8	5.76194
