# Supplementary material for: NopC/T/L Signal Crosstalk Gene GmPHT1-4
Source: Int J Mol Sci. 2023 Nov 20;24(22):16521. doi: 10.3390/ijms242216521 (PMC10671193; doi:10.3390/ijms242216521)
Supplement: Supplementary file 1 [file ijms-24-16521-s001.zip › Table S2 Nodular dry weight statistics.xlsx]

## Sheet: Sheet1
Table S2 Nodular dry weight statistics (g)
HH103	NopC	NopL	NopT	TCL	TtsI	SD
0.07293	0.024712	0.05376	0.04655	0.05652	0.005536	0.024266
0.08619	0.040157	0.03584	0.07105	0.07536	0.01384	0.027989
0.09282	0.037068	0.03584	0.0637	0.07536	0.01384	0.029264
0.09503	0.046335	0.0224	0.0441	0.08478	0.01384	0.032704
0.09724	0.040157	0.06048	0.02695	0.0942	0.02768	0.031805
0.0663	0.052513	0.03808	0.04655	0.05181	0.024912	0.014093
0.11271	0.03089	0.07392	0.06125	0.08478	0.016608	0.035356
0.06851	0.03089	0.04256	0.03675	0.08949	0.002768	0.030294
0.05746	0.049424	0.04928	0.0441	0.0471	0.030448	0.008944
0.04641	0.024712	0.02912	0.04655	0.04239	0.022144	0.011168
