# Supplementary material for: NopC/T/L Signal Crosstalk Gene GmPHT1-4
Source: Int J Mol Sci. 2023 Nov 20;24(22):16521. doi: 10.3390/ijms242216521 (PMC10671193; doi:10.3390/ijms242216521)
Supplement: Supplementary file 1 [file ijms-24-16521-s001.zip › Table S3 Primer table.xlsx]

## Sheet: Sheet1
Table S3 Primer table
Primer name	Primer sequence	Amplified fragment（bp）
NopT-S-F-X	GCGTCGACCTCCACAATCGCCTCGAGACT	3020
NopT-A-R-X	GCTCTAGAAAGCTTGATTTCCAGCC	3020
Cm-F	ATCCGAACAATCCCAGTCAGGCCCTA	1010
Cm-R	GAGGAGGTACTGGGATTACGCCC	1010
Sb-NopT-Cm-F	TGTGATGGCTTCCATGTC	200
Sb-NopT-Cm-R	TCGGATTGACGGATGACT	200
GmPHT1-4-F	attgattagagatcttctagaATGGGGAAGGAGCAAGTTCAG	1566
GmPHT1-4-R	aatgtcgacggtaccggatccCACCTTGGTCTCCTCTTCTTGC	1566
NopT-S-F /R-X is the integral primer of NopT after insertion of Cm resistant fragment; Cm-F/R was the fragment primer for chloramphenicol resistance. Sb-NopT-Cm-F/R was the probe primer.
